# Supplementary material
Source: Springer Nature journal article supplement (https://www.springermedizin.de/resource/supplementary/12914_2008_79_MOESM1_ESM.pdf/9537468)

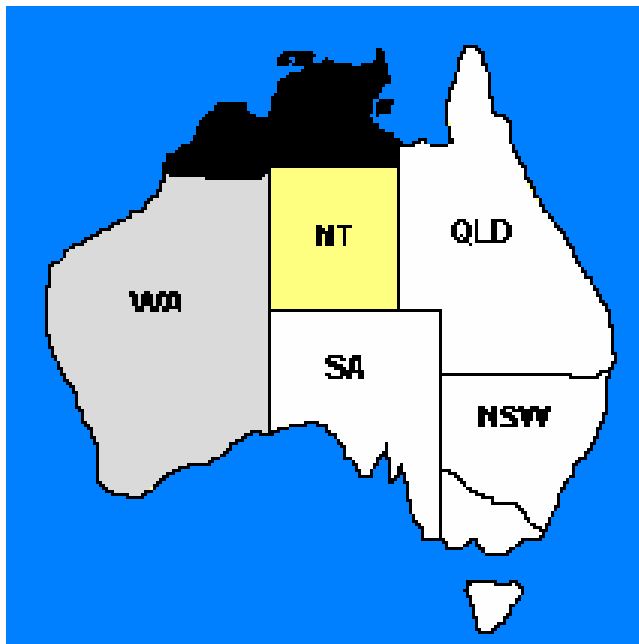

WA

NT

QLD

SA

NSW

Supplement: MOESM1 [file 9537468]
